# Supplementary material for: Vanadium nitride functionalization and denitrogenation by carbon disulfide and dioxideElectronic supplementary information (ESI) available: synthetic, spectroscopic, analytical, and computational results for all new complexes. Fig. S1: frontier orbitals of model anions: See http://www.rsc.org/suppdata/cc/b1/b111550m/
Source: Royal Society of Chemistry journal article supplement (doi:10.1039/b111550m), 2002-03-26
Supplement: b111550m.doc [file b111550m.doc]

**Supporting Information for the paper entitled,**

**“Vanadium nitride functionalization and denitrogenation by carbon disulfide and dioxide”**

**Justin K. Brask, Víctor Durà-Vilà, Paula L. Diaconescu and Christopher C. Cummins***

Department of Chemistry, Room 2-227, Massachusetts Institute of Technology, Cambridge, MA 02139-4307, USA.

# **Contents**

# **1. Experimental Procedure** 3

1.1. General Considerations 3

- 1. Synthesis of {[Ar(1Ad)N]3VNNa}*n* 3

1.3. Synthesis of [Ar(But)N]3V(NCS2)Na(THF)2 4

1.4. Synthesis of [Ar(But)N]3V(N13CS2)Na(THF)2 5

- 1. Synthesis of [Ar(1Ad)N]3V(NCS2)Na(THF)2 6

1.6. Synthesis of [Ar(1Ad)N]3V(N13CS2)Na(THF)2 6

1.7. Synthesis of [Ar(But)N]3VS 6

- 1. Synthesis of [Ar(But)N]3V(NCO2)Na(THF)2 9

1.9. Synthesis of [Ar(But)N]3VO 9

1.10. Kinetic Measurements 9

**2. Density Functional Theory Calculations** 10

**3. References** 14

### 1. Experimental Procedure

**1.1. General Considerations**

All manipulations were carried out in a nitrogen-filled drybox or under an argon stream by way of standard Schlenk techniques. Solvents, including deuterated solvents, were freed of impurities using standard procedures and stored over 4 Å molecular sieves under nitrogen. The complexes [Ar(R)N]3V [Ar = 3,5-Me2C6H3; R = But,1 1Ad2] and {[Ar(But)N]3VNNa}23 were prepared as previously reported. The reagent CS2 (Aldrich) was freshly distilled prior to use, while 13CS2 (Cambridge Isotope Laboratories) was employed as received. NaN3 (Aldrich) was prepared anhydrous via multiple washings with THF and subsequent drying *in vacuo*. Carbon dioxide (BOC Gases) was dried by passing through a column of P2O5. Elemental sulfur and pyridine *N*-oxide (Aldrich) were recrystallized from toluene prior to use. Unless indicated otherwise, all samples for NMR spectroscopy were prepared as solutions in benzene-d6 at 23 C. 51V NMR chemical shifts are reported relative to *neat* OVCl3 (0.0 ppm). Elemental analyses (C, H, N) were carried out by H. Kolbe Mikroanalytisches Laboratorium (Mülheim an der Ruhr, Germany).

**1.2. Synthesis of {[Ar(1Ad)N]3VNNa}*n***

NaN3 (0.500 g, 7.70 mmol) was added to a dark green solution of [Ar(1Ad)N]3V(3.24 g, 3.98 mmol) in THF (75 mL) cooled to –35 C. The mixture was stirred for 5 h at 23 C and subsequently filtered through Celite to remove excess NaN3. All volatiles were removed *in vacuo* and the resulting residue was collected on a frit and washed with cold (–35 C) pentane (3 x 25 mL). The remaining solid was dried *in vacuo*, yielding {[Ar(1Ad)N]3VNNa}*n* (2.16 g, 2.54 mmol, 64%) as a yellow powder. Anal. Calc. for C54H72N4NaV: C, 76.20; H, 8.53; N, 6.58. Found: C, 75.99; H, 8.61; N, 6.72%. 1H NMR (THF-d8, 23 C): ** 6.41 (s, 6 H, *para*), 5.4-6.0 (br, 12 H, *ortho*), 2.11 (br, 36 H, 1Ad), 2.03 (s, 36 H, Me) 1.99 (br, 18 H, 1Ad), 1.60 (br, 36 H, 1Ad). 51V NMR (THF-d8, 23 C): ** -248.5 (s, 1/2 = 83 Hz).

**1.3. Synthesis of [Ar(But)N]3V(NCS2)Na(THF)2**

CS2 (49.0 L, 0.815 mmol) was added via a 50 L syringe to a yellow/green solution of {[Ar(But)N]3VNNa}2 (0.500 g, 0.405 mmol) in THF (30 mL) cooled to –35 C. While still cold, all volatiles were quickly removed *in vacuo* from the resulting red solution to yield [Ar(But)N]3V(NCS2)Na(THF)2 (0.606 g, 0.724 mmol, 89%) as a dark red microcrystalline solid. Anal. Calc. for C45H70N4NaO2S2V: C, 64.56; H, 8.43; N, 6.69. Found: C, 64.73; H, 8.27; N, 6.52%. 1H NMR: ** 6.74 (s, 3 H, *para*), 3.68 (m, 8 H, THF), 2.20 (s, 18 H, Me), 1.84 (s, 27 H, But), 1.47 (m, 8 H, THF). 1H NMR (THF-d8, 23 C): ** 6.67 (s, 3 H, *para*), 3.62 (m, 8 H, THF), 2.13 (s, 18 H, Me), 1.77 (m, 8 H, THF), 1.37 (s, 27 H, But). 51V NMR: ** 26.9 (br, 1/2 = 406 Hz). 51V NMR (THF-d8, 23 C): ** -54.1 (t, 14N-51V = 100 Hz, Fig. A).

**Fig. A** 51V NMR spectrum for the complex [Ar(But)N]3V(NCS2)Na(THF)2 in THF-d8 solution at 23 C.

**1.4. Synthesis of [Ar(But)N]3V(N13CS2)Na(THF)2**

Complex [Ar(But)N]3V(N13CS2)Na(THF)2 was prepared by employing 13CS2 (99.5%) in the synthetic protocol for [Ar(But)N]3V(NCS2)Na(THF)2, as outlined in Section 1.3. 13C NMR (13CS2 moiety): ** 234.8 (br, 1/2 = 172 Hz). 13C NMR (13CS2 moiety, THF-d8, 23 C): ** 236.8 (br, 1/2 = 340 Hz). 51V NMR (THF-d8, 23 C): ** -55.8 (br, 1/2 = 274 Hz).

**1.5. Synthesis of [Ar(1Ad)N]3V(NCS2)Na(THF)2**

CS2 (35.5 L, 0.590 mmol) was added via a 50 L syringe to a yellow/green solution of {[Ar(1Ad)N]3VNNa}*n* (0.500 g, 0.590 mmol) in THF (30 mL) cooled to –35 C. The resulting red solution was stirred for 0.5 h, after which time all volatiles were removed *in vacuo* to yield [Ar(1Ad)N]3V(NCS2)Na(THF)2 (0.584 g, 0.545 mmol, 92%) as a dark red powder, which was further purified via recrystallization from diethyl ether at –35 C (*ca*. 40% yield). Anal. Calc. for C63H88N4NaO2S2V: C, 70.62; H, 8.28; N, 5.23. Found: C, 70.44; H, 8.19; N, 5.36%. 1H NMR: ** 7.23 (br, 3 H, *ortho*), 6.78 (s, 3 H, *para*), 5.00 (br, 3 H, *ortho*), 3.65 (m, 8 H, THF), 2.73 (br, 9 H, 1Ad), 2.27 (br, 36 H, Me + 1Ad), 2.01 (d, 9 H, 1Ad), 1.69 (d, 9 H, 1Ad), 1.46 (m, 8 H, THF). 51V NMR: ** 44.0 (s, 1/2 = 397 Hz). 51V NMR (THF-d8, 23 C): ** -16.5 (t, 14N-51V = 88 Hz).

**1.6. Synthesis of [Ar(1Ad)N]3V(N13CS2)Na(THF)2**

Complex [Ar(1Ad)N]3V(N13CS2)Na(THF)2 was prepared by employing 13CS2 (99.5%) in the synthetic protocol for [Ar(1Ad)N]3V(NCS2)Na(THF)2, as outlined in Section 1.5. 13C NMR (13CS2 moiety, THF-d8, 23 C): ** 234.1 (br, 1/2 = 230 Hz). 51V NMR (THF-d8, 23 C): ** -20.4 (br, 1/2 = 252 Hz).

**1.7. Synthesis of [Ar(But)N]3VS**

Protocol 1: Complex [Ar(But)N]3V(NCS2)Na(THF)2 (1.00 g, 1.19 mmol) was dissolved in THF (25 mL) and stirred for 24 h at 23 C. All volatiles were removed *in vacuo* and the resulting red residue was taken up in diethyl ether and filtered through a fine glass frit to remove NaNCS [0.092 g, 1.14 mmol, 96%; 13C NMR (D2O, 23 C): ** 133.70 (s), *cf.* NaNCS (Aldrich) 13C NMR (D2O, 23 C): ** 133.69 (s)]. Removal of diethyl ether *in vacuo* yielded the dark red microcrystalline solid of [Ar(But)N]3VS (0.684 g, 1.12 mmol, 94%). Crystals suitable for X-ray crystallography were obtained by cooling a concentrated diethyl ether solution of [Ar(But)N]3VS to –35 C for 48 h (Fig. B). Anal. Calc. for C36H54N3SV: C, 70.67; H, 8.90; N, 6.87. Found: C, 70.51; H, 8.74; N, 6.99%. 1H NMR: ** 7.05 (br, 3 H, *ortho*), 6.65 (s, 3 H, *para*), 4.55 (br, 3 H, *ortho*), 2.10 (br, 18 H, Me), 1.66 (s, 27 H, But). 1H NMR (THF-d8, 23 C): ** 6.85 (br, 3 H, *ortho*), 6.74 (s, 3 H, *para*), 4.29 (br, 3 H, *ortho*), 2.25 (br, 9 H, Me), 2.00 (br, 9 H, Me), 1.46 (s, 27 H, But). 51V NMR: ** 659.0 (s, 1/2 = 262 Hz). 51V NMR (THF-d8, 23 C): ** 660.6 (s, 1/2 = 215 Hz).

Protocol 2: S8 (0.028 g, 0.108 mmol) was added to a dark green solution of [Ar(But)N]3V (0.500 g, 0.862 mmol) in diethyl ether (25 mL) cooled to –35 C. The resulting dark red solution was stirred for 2 h, after which time all volatiles were removed *in vacuo* to yield [Ar(But)N]3VS (0.491 g, 0.802 mmol, 93%) as a dark red microcrystalline solid.


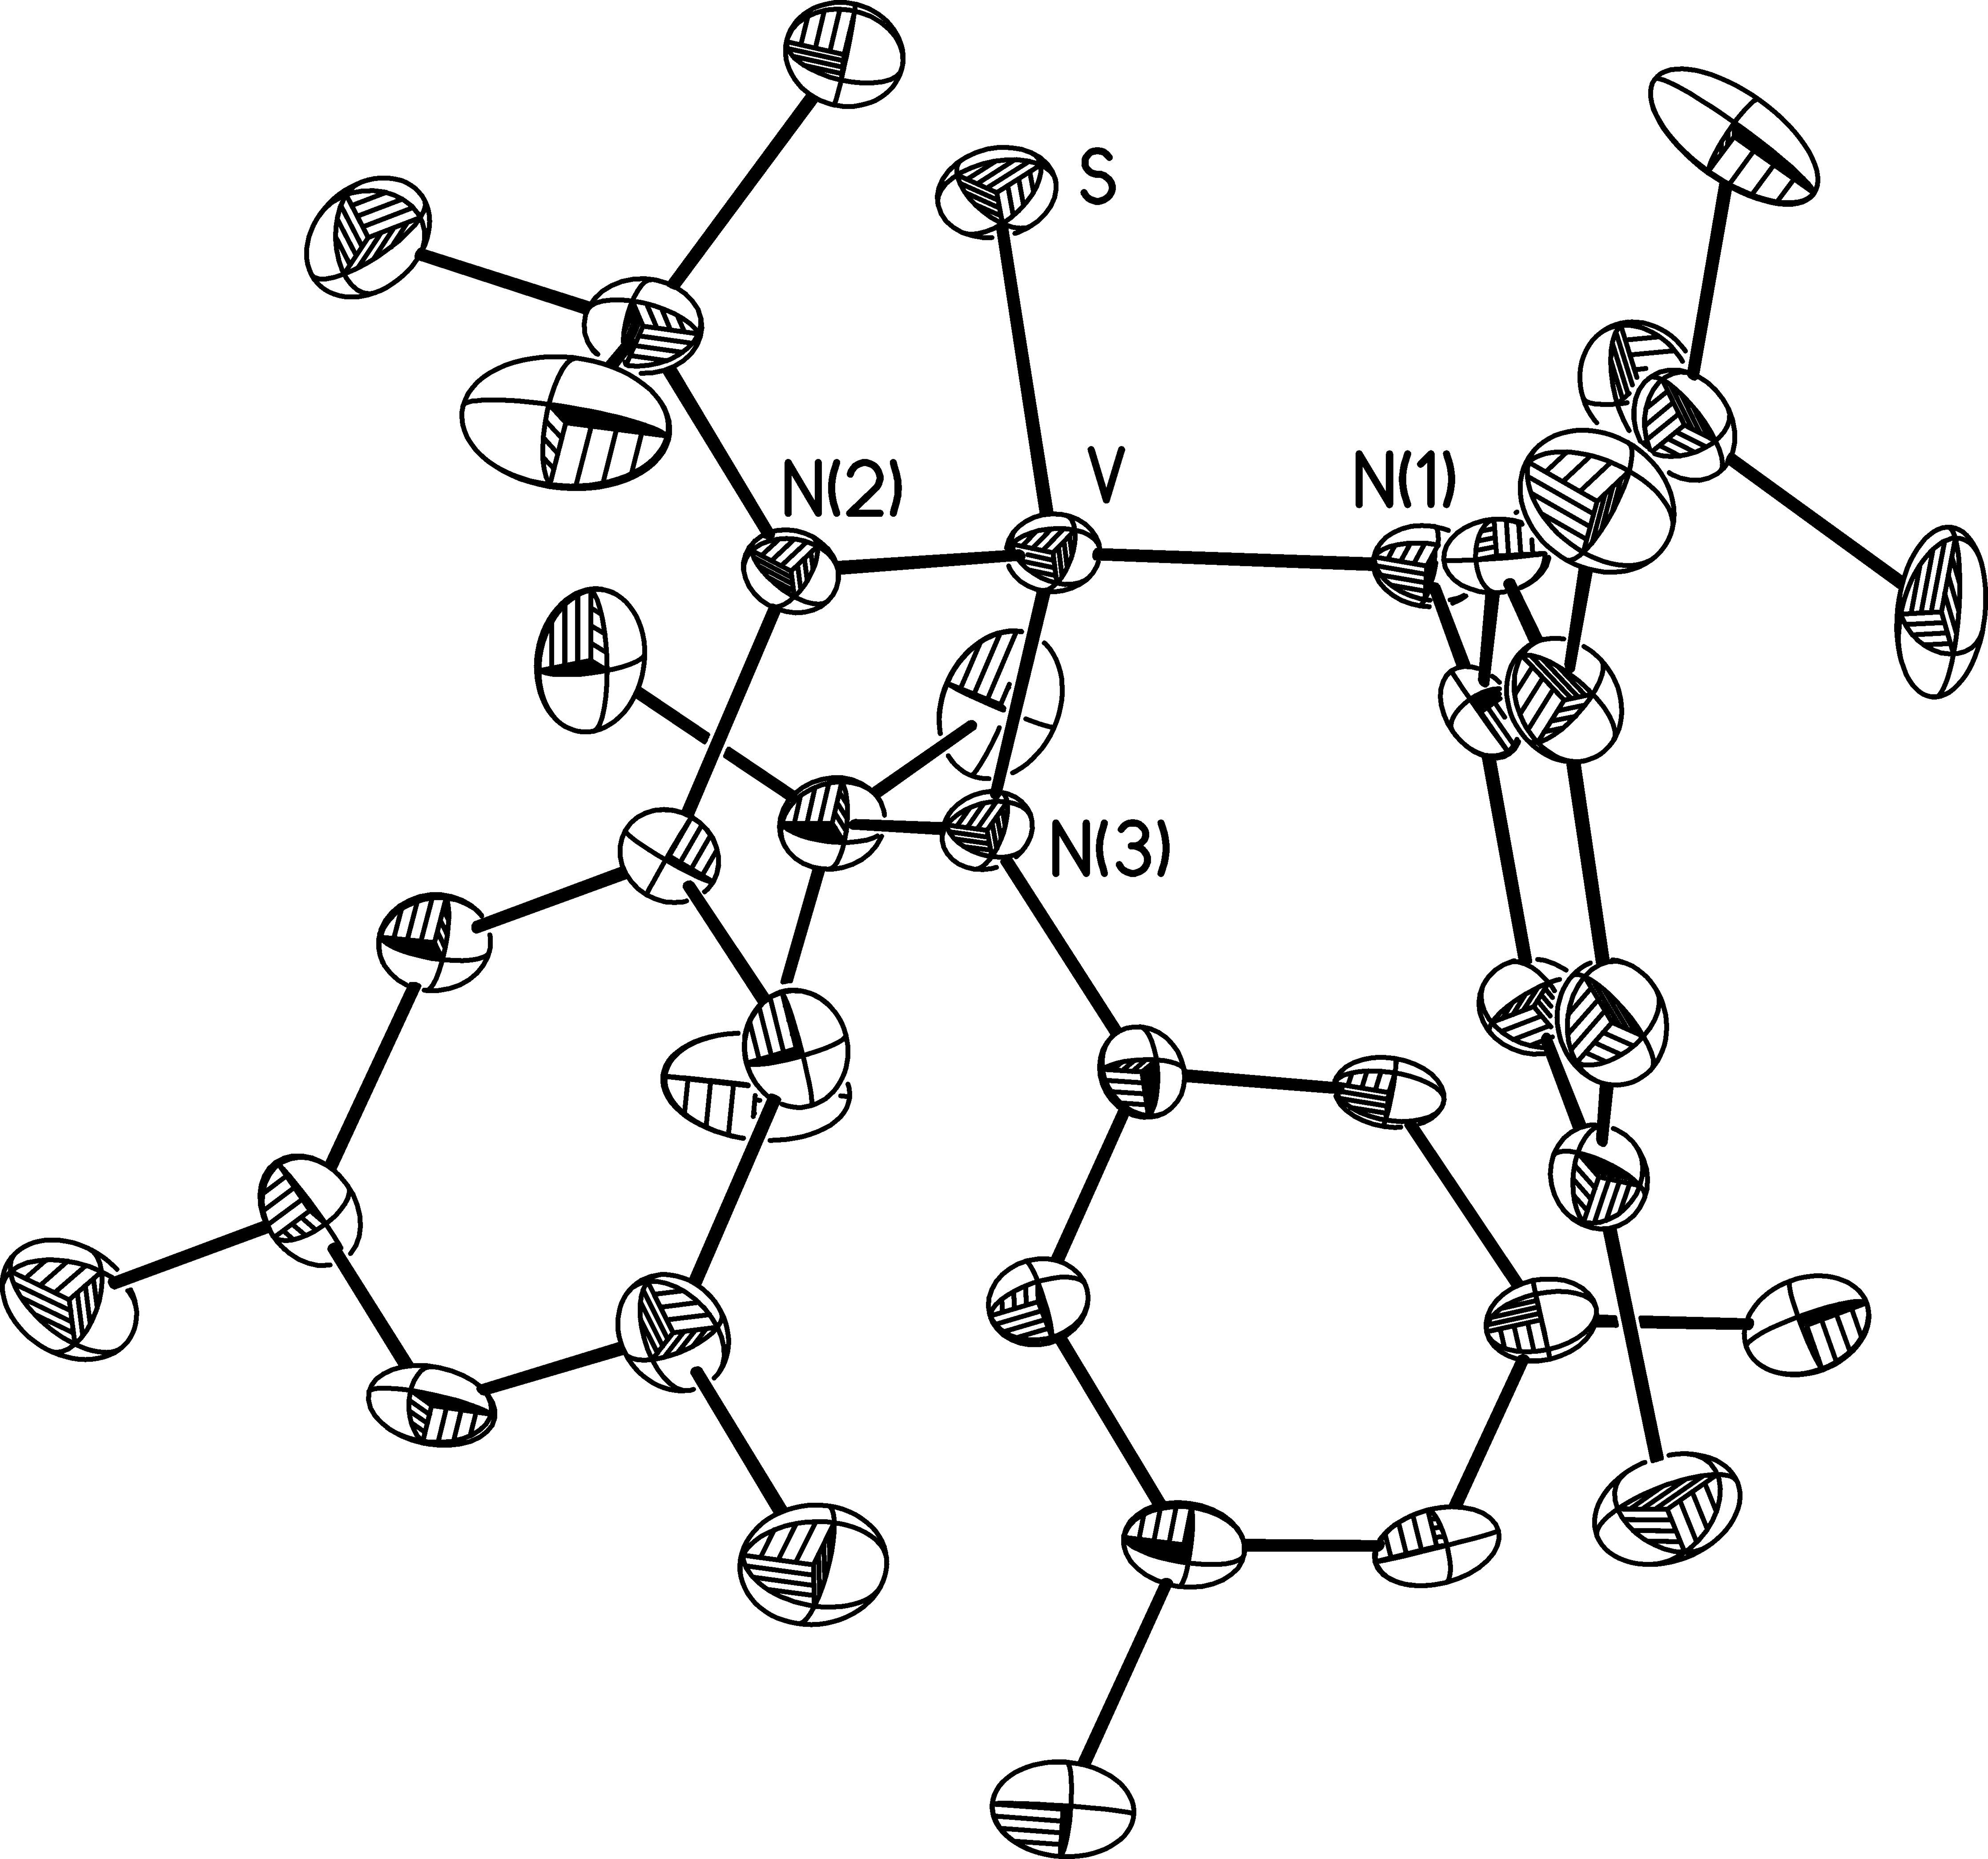


**Fig. B** ORTEP drawing for the complex [Ar(But)N]3VS.

**1.8. Synthesis of [Ar(But)N]3V(NCO2)Na(THF)2**

On a Schlenk line, a stream of dry CO2 was bubbled through a cooled (0 C) yellow/green solution of {[Ar(But)N]3VNNa}2 (0.500 g, 0.405 mmol) in THF (30 mL) until the reaction mixture became yellow/orange in color. All volatiles were removed *in vacuo* to yield [Ar(But)N]3V(NCO2)Na(THF)2 (0.626 g, 0.778 mmol, 96%) as an orange microcrystalline solid. Anal. Calc. for C45H70N4NaO4V: C, 67.14; H, 8.76; N, 6.96. Found: C, 67.23; H, 8.65; N, 6.77%. 1H NMR: ** 7.20 (br, 3 H, *ortho*), 6.74 (s, 3 H, *para*), 5.00 (br, 3 H, *ortho*), 3.72 (br, 8 H, THF), 2.20 (s, 18 H, Me), 1.85 (s, 27 H, But), 1.51 (br, 8 H, THF). 51V NMR: ** -231.6 (br, 1/2 = 1060 Hz).

**1.9. Synthesis of [Ar(But)N]3VO**

Pyridine *N*-oxide (0.082 g, 0.862 mmol) was added to a dark green solution of [Ar(But)N]3V (0.500 g, 0.862 mmol) in diethyl ether (30 mL) cooled to –35 C. The resulting red solution was stirred for 3 h, after which time all volatiles were removed *in vacuo* to yield [Ar(But)N]3VO (0.482 g, 0.809 mmol, 94%) as an orange powder. Crystalline material was obtained in 24 h (*ca.* 50% yield) by dissolving [Ar(But)N]3VO in fresh diethyl ether and cooling the solution to -35 C. Anal. Calc. for C36H54N3OV: C, 72.58; H, 9.14; N, 7.05. Found: C, 72.41; H, 8.98; N, 7.11%. 1H NMR: ** 6.68 (s, 3 H, *para*), 2.11 (s, 18 H, Me), 1.56 (s, 27 H, But). 51V NMR: ** -170.8 (s, 1/2 = 290 Hz).

**1.10. Kinetic Measurements**

The conversion of [Ar(But)N]3V(NCS2)Na(THF)2 to [Ar(But)N]3VS was monitored by single-pulse 1H NMR spectroscopy in THF-d8 solvent at 25 C. Spectra for [Ar(But)N]3V(NCS2)Na(THF)2 were collected at 5 min intervals to four half-lives. Relative ratios of [Ar(But)N]3V(NCS2)Na(THF)2 : [Ar(But)N]3VS were determined by integration of their respective But resonances as corrected against ferrocene, which was employed as an internal standard. Three runs were carried out for each of the following concentrations of [Ar(But)N]3V(NCS2)Na(THF)2 in THF-d8: 5.00 x 10-3 mol/L, 1.00 x 10-2 mol/L, and 1.00 x 10-1 mol/L. Linear regression of the data obtained from these spectra reveals that the conversion of [Ar(But)N]3V(NCS2)Na(THF)2to [Ar(But)N]3VS is first order in [Ar(But)N]3V(NCS2)Na(THF)2 with *k*obs = 2.21 + 0.07 x 10-4 s-1 (95% confidence interval).

**2. Density Functional Theory Calculations**

The Amsterdam Density Functional package (version *ADF2000.02*)4 was used to optimize the geometry and derive the 51V NMR chemical shift values5 for models of relevant complexes. In these calculations, the anilide ligands were simplified to -NMe2 groups for the purpose of minimizing the calculation time. The remaining parts of the molecules were not simplified.

Geometry optimizations, preceding the NMR calculations, were run using the ZORA(V) basis set for all atoms, as implemented in the ADF suite. Full electronic configuration was used for all atoms. The methyl groups of the amide ligands were not allowed to optimize. Additionally, the dihedrals and bond angles of the amide ligands were kept as obtained from a partially optimized vanadium tris(*tert*-butyl)anilide complex6 under the QM/MM framework7 without any simplifications.

Relativistic effects were included by virtue of the zero order regular approximation (ZORA).8 However, no spin-orbit coupling effects were taken into account in the derivation of the isotropic shielding of the vanadium atoms. The local density approximation (LDA) by Vosko, Wilk and Nusair (VWN)9 was used together with the exchange and correlation corrections published by Perdew and Wang in 1991 (PW91).10

**Table A.** Experimental 51V NMR chemical shifts and calculated total isotropic shieldings.

|  | Chemical shift/ppm (experimental, C6D6) | Shielding (theoretical) |
| --- | --- | --- |
| {[Ar(But)N]3VN}- | -173.5 | -1626.0 |
| [Ar(But)N]3VO | -170.8 | -1628.4 |
| [Ar(But)N]3VS | 659.0 | -2347.4 |
| [Ar(But)N]3VSe | 1001.2a | -2568.2 |
| {[Ar(But)N]3VNCO2}- | -231.6 | -1546.2 |
| {[Ar(But)N]3VNCS2}- b | 26.9 | -1622.4 |
| {[Ar(But)N]3VNCS2}- c | - | -2512.9 |

a: The experimental value actually corresponds to [Ar(1Ad)N]3VSe.2

b: No S to V coordination.

c: One of the S atoms is coordinated to V, forming a 4-membered V-N-C-S ring.

Overall, the calculated differences in the chemical shifts compared very well with those differences between the experimental values, *i.e.* near or less than 10% error relative to the total range of the system under study (more than 1200 ppm). A second structure for {[Ar(But)N]3V(NCS2)}- was calculated bearing a 4-membered V-N-C-S ring as a result of one of the S atoms being coordinated to V. The predicted resonance, which is approximately 800 ppm downfield from the experimental value, negates this structure as a possibility for [Ar(But)N]3V(NCS2)Na(THF)2 (see Table B).

**Table B.** Experimental and theoretical  51V NMR values relative to [Ar(But)N]3VS.

|  | , experimental | , theoretical |
| --- | --- | --- |
| {[Ar(But)N]3VN}- | 832.5 | 721.4 |
| [Ar(But)N]3VO | 829.8 | 719.0 |
| [Ar(But)N]3VS | 0 | 0 |
| [Ar(But)N]3VSe | -342.2a | -220.8 |
| {[Ar(But)N]3VNCO2}- | 890.6 | 801.2 |
| {[Ar(But)N]3VNCS2}- b | 632.1 | 725.0 |
| {[Ar(But)N]3VNCS2}- c | - | -165.5 |

a: The experimental value actually corresponds to [Ar(1Ad)N]3VSe.2

b: No S to V coordination.

c: One of the S atoms is coordinated to V, forming a 4-membered V-N-C-S ring.

**Table C.** Paramagnetic and diamagnetic contributions to the total isotropic shielding of the V nucleus.

|  |  | Shielding |
| --- | --- | --- |
| {[Ar(But)N]3VN}- | Paramagnetic | -3323.285 |
|  | Diamagnetic | 1697.293 |
| [Ar(But)N]3VO | Paramagnetic | -3322.404 |
|  | Diamagnetic | 1693.985 |
| [Ar(But)N]3VS | Paramagnetic | -4046.129 |
|  | Diamagnetic | 1698.775 |
| [Ar(But)N]3VSe | Paramagnetic | -4263.581 |
|  | Diamagnetic | 1695.408 |
| {[Ar(But)N]3VNCO2}- | Paramagnetic | -3243.004 |
|  | Diamagnetic | 1696.847 |
| {[Ar(But)N]3VNCS2}- | Paramagnetic | -3318.649 |
|  | Diamagnetic | 1696.236 |

Although no relationship was established between the charges of the relevant atoms in the complexes under investigation and the corresponding 51V NMR chemical shift values, here we list the values for both the Mulliken and Hirshfeld charges.

**Table D.** Mulliken and Hirshfeld charges for relevant atoms.

|  |  | Mulliken | Hirshfeld |
| --- | --- | --- | --- |
| {[Ar(But)N]3VN}- | V | 1.1610 | 0.2810 |
|  | N | -0.6786 | -0.4880 |
|  | Na,b | -0.7172 | -0.1841 |
| [Ar(But)N]3VO | V | 1.5237 | 0.4356 |
|  | O | -0.6440 | -0.3133 |
|  | Na,b | -0.7170 | -0.1532 |
| [Ar(But)N]3VS | V | 1.1222 | 0.3333 |
|  | S | -0.3372 | -0.2335 |
|  | Na,b | -0.6895 | -0.1461 |
| [Ar(But)N]3VSe | V | 1.2946 | 0.3242 |
|  | Se | -0.5231 | -0.2187 |
|  | Na,b | -0.6931 | -0.1445 |
| {[Ar(But)N]3VNCO2}- | V | 1.4070 | 0.3743 |
|  | Oa | -0.6412 | -0.3881 |
|  | N | -0.5885 | -0.2413 |
|  | Na,b | -0.7198 | -0.1669 |
|  | C | 0.6596 | 0.1200 |
| {[Ar(But)N]3VNCS2}- | V | 1.5184 | 0.3904 |
|  | Sa | -0.4193 | -0.3675 |
|  | N | -0.5080 | -0.2257 |
|  | Na,b | -0.7187 | -0.1607 |
|  | C | -0.0465 | -0.0100 |

a: Average.

b: Amide ligands.

Table E displays the calculated differences in enthalpy for all relevant compounds. These values give an estimate of the relative enthalpies of compounds belonging to the current system under scrutiny, but should not be taken as absolute values for comparison with differing systems.11

**Table E.** Calculated enthalpies for relevant compounds.

|  | Enthalpy  kcal/mol |
| --- | --- |
| CO2 | -534.54 |
| CS2 | -378.04 |
| NCO- | -576.60 |
| SCN- | -515.80 |
| {[Ar(But)N]3VN}- | -3760.34 |
| {[Ar(But)N]3VNCO2}- a | -4313.82 |
| {[Ar(But)N]3VNCO2}- b | -4304.45 |
| [Ar(But)N]3VO | -3740.21 |
| {[Ar(But)N]3VNCS2}- a | -4171.92 |
| {[Ar(But)N]3VNCS2}- b | -4155.95 |
| [Ar(But)N]3VS | -3664.88 |

a: No O or S to V coordination.

b: One of the O or S atoms is coordinated to V, forming a 4-membered ring.

**3. References**

1. M. G. Fickes, Ph.D. Thesis, Massachusetts Institute of Technology, MA, 1998.
2. K. B. P. Ruppa, N. Desmangles, S. Gambarotta, G. Yap and A. L. Rheingold, *Inorg. Chem.*, 1997, **36**, 1194.
3. J. K. Brask, M. G. Fickes, P. Sangtrirutnugul, V. Durà-Vilà, A. L. Odom and C. C. Cummins, *Chem. Commun.*, 2001, 1676.
4. (*a*) E. J. Baerends, D. E. Ellis and P. Ros, *Chem. Phys.*, 1973, **2**, 41; (*b*) L. Versluis and T. Ziegler, *J. Chem. Phys.*, 1988, **88**, 322; (*c*) G. te Velde and E. J. Baerends, *J. Comput. Phys.*, 1992, **99**, 84; (*d*) C. Fonseca Guerra, J. G. Snijders, G. te Velde and E. J. Baerends, *Theor. Chem. Acc.*, 1998, **99**, 391.
5. (*a*) G. Schreckenbach and T. Ziegler, *J. Phys. Chem.*, 1995, **99**, 606; (*b*) G. Schreckenbach and T. Ziegler, *Int. J. Quantum Chem.*, 1996, **60**, 753; (*c*) G. Schreckenbach and T. Ziegler, *Int. J. Quantum Chem.*, 1997, **61**, 899; (*d*) S. K. Wolff and T. Ziegler, *J. Chem. Phys.*, 1998, **109**, 895; (*e*) S. K. Wolff, T. Ziegler, E. van Lenthe and E. J. Baerends, *J. Chem. Phys.*, 1999, **110**, 7689; (*f*) T. M. Gilbert and T. Ziegler, *J. Phys. Chem. A*, 1999, **103**, 7535.
6. V. Durà-Vilà and C. C. Cummins, unpublished results.
7. T. K. Woo, L. Cavallo and T. Ziegler, *Theor. Chem. Acc.*, 1998, **100**, 307.
8. (*a*) J. G. Snijders, E. J. Baerends and P. Ros, *Mol. Phys.*, 1979, **38**, 1909; (*b*) T. Ziegler, V. Tschinke, E. J. Baerends, J. G. Snijders and W. Ravenek, *J. Phys. Chem.*, 1989, **93**, 3050; (*c*) E. van Lenthe, E. J. Baerends and J. G. Snijders, *J. Chem. Phys.*, 1993, **99**, 4597; (*d*) Although inclusion of relativistic effects in calculations where vanadium is the heaviest atom may seem unnecessary (*ref. 5c*), they were taken into account in order to remain consistent within the context of a broader study involving heavier transition metal elements, *e.g.* Nb (*ref. 6*).
9. S. H. Vosko, L. Wilk and M. Nusair, *Can. J. Phys.*, 1980, **58**, 1200.
10. J. P. Perdew, J. A. Chevary, S. H. Vosko, K. A. Jackson, M. R. Pederson, D. J. Singh and C. Fiolhais, *Phys. Rev. B*, 1992, **46**, 6671.
11. (*a*) E. J. Baerends, V. Branchadell and M. Sodupe, *Chem. Phys. Lett.*, 1997, **265**, 481; (*b*) *ADF User’s Guide*, http://www.scm.com/Doc/ADFUG/UsersGuide.html.
